# Supplementary material for: Ag85a-S2 Activates cGAS-STING Signaling Pathway in Intestinal Mucosal Cells
Source: MDPI journal article supplement (doi:10.3390/vaccines10122170), 2022-12-16
Supplement: s1 [file s1]

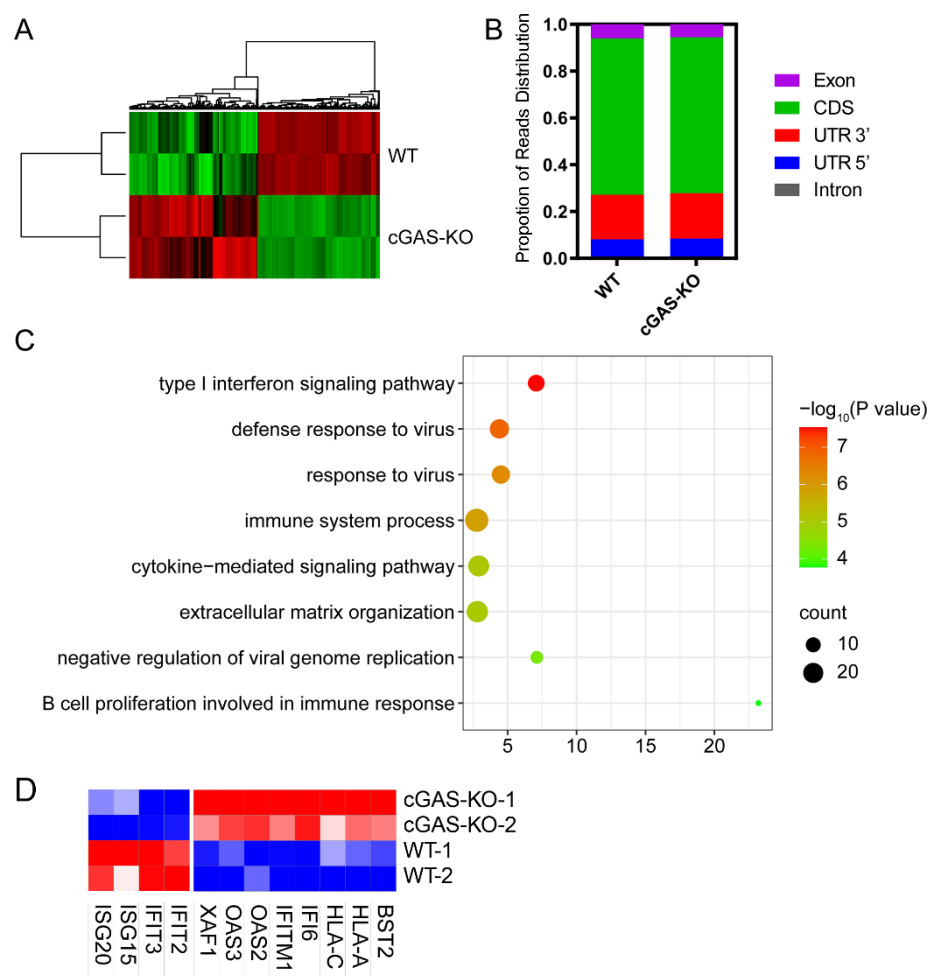

**Figure S1. cGAS regulates key genes in IFN and cytokines pathways.** (A) Differentially expressed genes in wild-type (WT) and cGAS knockout Caco-2 cells (cGAS-KO). (B) The distribution of reads from RNA-seq across the gene structure. (C) Gene ontology analysis of differentially expressed genes in (A). (D) Sub-heatmap showing the representative differentially expressed genes.
